# Supplementary material for: Enhanced electronic and optical properties of three TMD heterobilayers
Source: Royal Society of Chemistry journal article supplement (doi:10.1039/c8cp02995d), 2018-01-01
Supplement: c8cp02995d1.pdf [file c8cp02995d1.pdf]

## Supplementary Information

### Enhanced Electronic and Optical Properties of Three TMD Heterobilayers

Shafiq Ur Rehman and Z.J. Ding\*

Key Laboratory of Strongly-Coupled Quantum Matter Physics, Chinese Academy of Sciences;

Hefei National Laboratory for Physical Sciences at Microscale and Department of Physics,

University of Science and Technology of China, Hefei, Anhui 230026, People's Republic of

China

\*Corresponding author: [zjding@ustc.edu.cn](mailto:zjding@ustc.edu.cn)

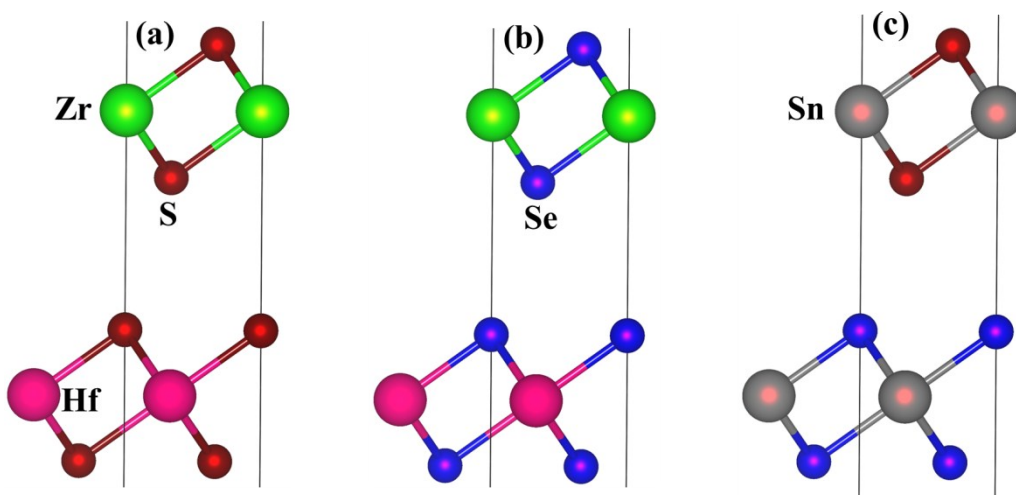

S1: The side view of the optimized structures with AB-stacking: (a)  $\text{ZrS}_2/\text{HfS}_2$ ; (b)  $\text{ZrSe}_2/\text{HfSe}_2$  and (c)  $\text{SnS}_2/\text{SnSe}_2$  heterobilayers.

Table. S1: Geometric parameters (lattice constant  $a$ , spacing  $d$ , bond length and binding energy  $E_b$  for the predicted heterobilayers (L= Hf, Zr and Sn) with AB stacking.

| Heterobilayers | $\text{ZrS}_2/\text{HfS}_2$ | $\text{ZrSe}_2/\text{HfSe}_2$ | $\text{SnS}_2/\text{SnSe}_2$ |
|----------------|-----------------------------|-------------------------------|------------------------------|
| $a$ (Å)        | 3.63                        | 3.63                          | 3.63                         |
| $d$ (Å)        | 5.49                        | 5.49                          | 5.49                         |

|                 |        |        |        |
|-----------------|--------|--------|--------|
| L-S (Å)         | 2.55   | -      | 2.57   |
| L-Se (Å)        | -      | 2.65   | 2.68   |
| $E_b$ (eV/atom) | -0.021 | -0.011 | -0.030 |

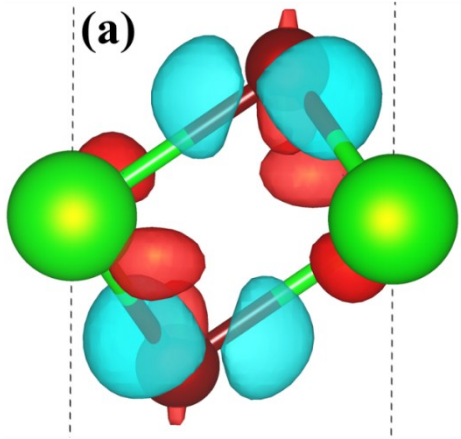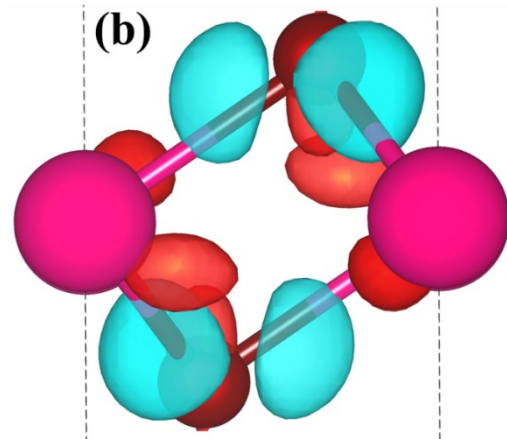

S2: Electronic charge density difference for (a) ZrS<sub>2</sub> monolayer and (b) HfS<sub>2</sub> monolayer at the isosurface of  $5.3 \times 10^{-4} e/\text{Å}$ . Where red color indicates charge accumulation (electrons) and cyan color charge depletion (holes).

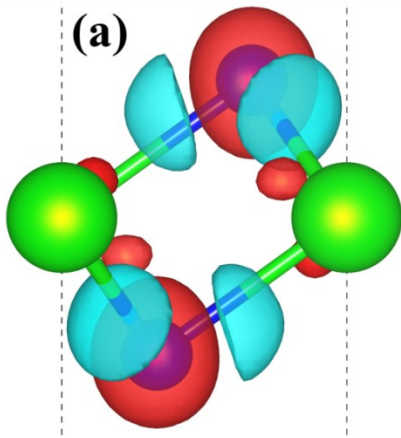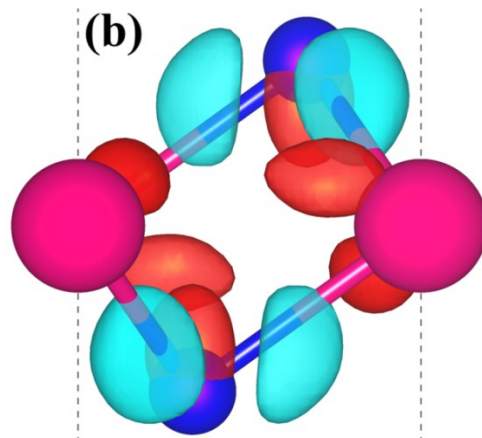

S3: Electronic charge density difference for (a) ZrSe<sub>2</sub> monolayer and (b) HfSe<sub>2</sub> monolayer at the isosurface of  $5.3 \times 10^{-4} e/\text{Å}$ . Where red color indicates charge accumulation (electrons) and cyan color charge depletion (holes).

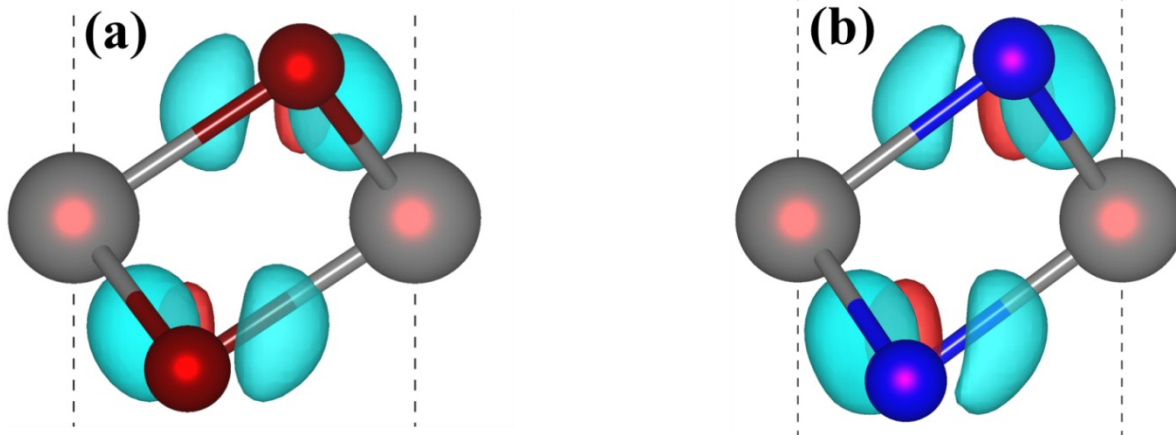

S4: Electronic charge density difference for (a) SnS<sub>2</sub> monolayer and (b) SnSe<sub>2</sub> monolayer at the isosurface of  $5.3 \times 10^{-4} e/\text{\AA}$ . Where red color indicates charge accumulation (electrons) and cyan color charge depletion (holes).

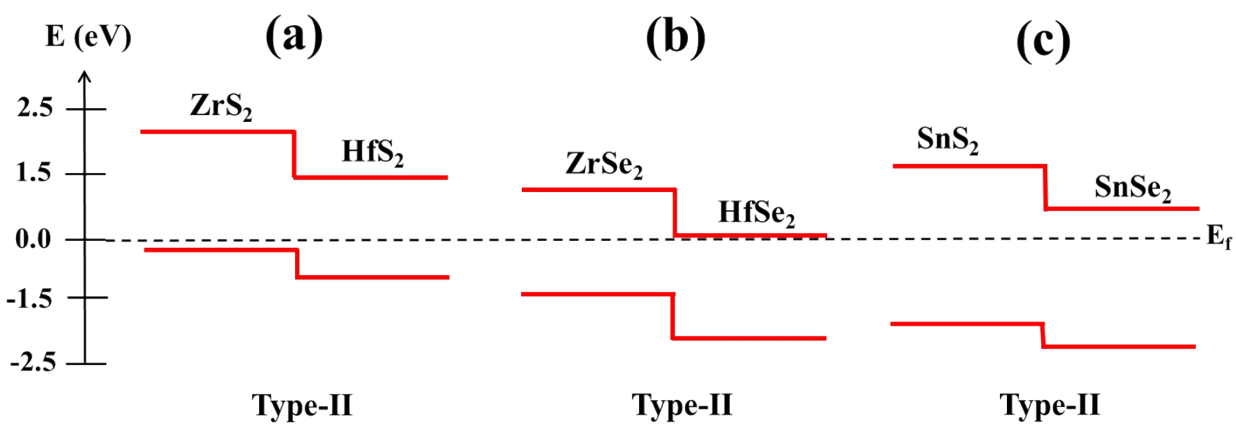

S5: Schematic diagram of the Type-II band alignment between two isolated monolayers: (a) ZrS<sub>2</sub> and HfS<sub>2</sub>; (b) ZrSe<sub>2</sub> and HfSe<sub>2</sub>; (c) SnS<sub>2</sub> and SnSe<sub>2</sub>.
